# Supplementary material for: The genome and occlusion bodies of marine Penaeus monodon nudivirus (PmNV, also known as MBV and PemoNPV) suggest that it should be assigned to a new nudivirus genus that is distinct from the terrestrial nudiviruses
Source: Springer Nature journal article supplement (doi:10.1186/1471-2164-15-628), 2014-07-25
Supplement: 12864_2014_6342_MOESM10_ESM.pdf [file 12864_2014_6342_MOESM10_ESM.pdf]

Hepatopancreas cells were lysed by 1/3 PBS

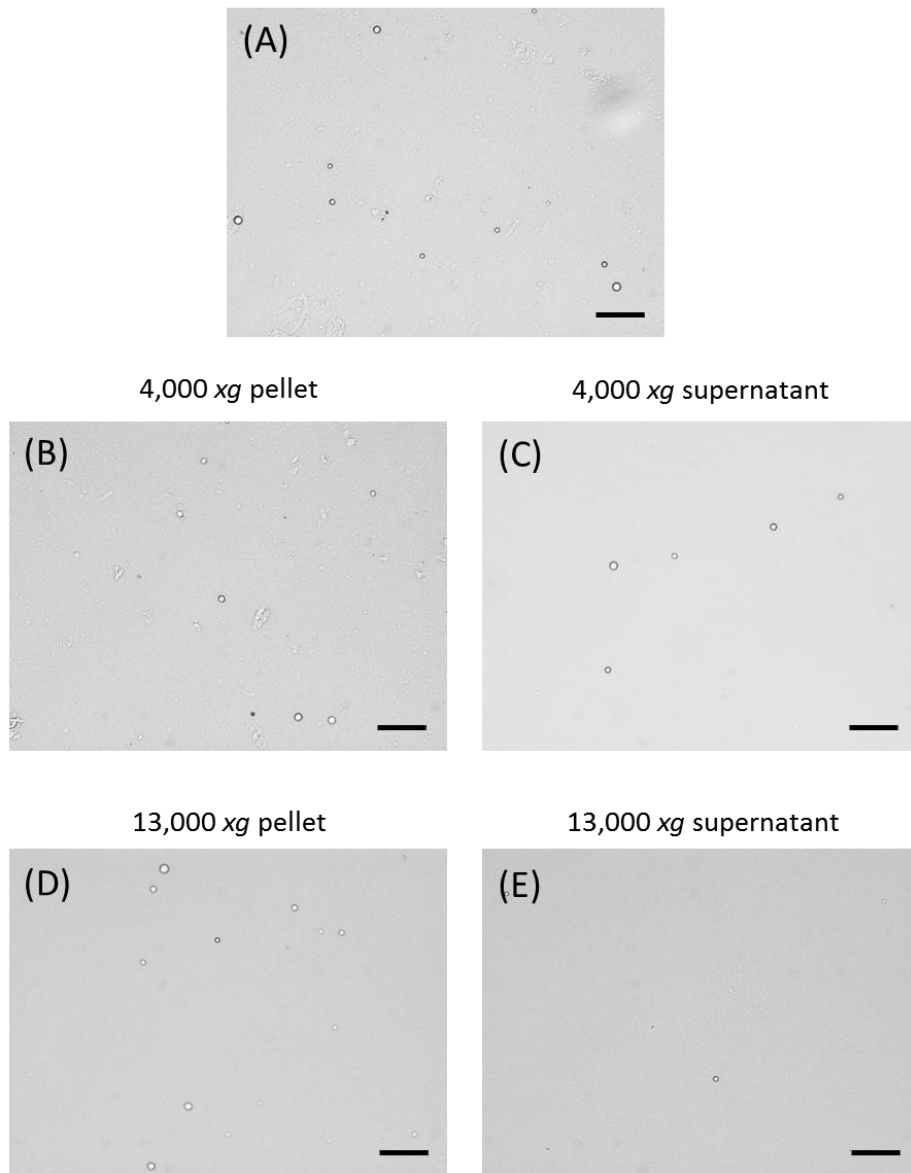

Fig. S4. Micrographs of PmNV OBs from PmNV-infected hepatopancreatic tissue that had been homogenized and lysed by 1/3 PBS. (A) Lysate of hepatopancreas was lysed by 1/3 PBS. (B) - (E) OBs in the resuspended pellets and the supernatants after centrifugation at 4,000  $\times$ g for 10 min or 13,000  $\times$ g for 30 min as indicated. Scale bar: 50  $\mu$ m.
