# Supplementary material for: The genome and occlusion bodies of marine Penaeus monodon nudivirus (PmNV, also known as MBV and PemoNPV) suggest that it should be assigned to a new nudivirus genus that is distinct from the terrestrial nudiviruses
Source: BMC Genomics. 2014 Jul 25;15(1):628. doi: 10.1186/1471-2164-15-628 (PMC4132918; doi:10.1186/1471-2164-15-628)
Supplement: Supplementary file 8 — Additional file 8: Table S6: Sequence accession numbers of the phylogenetic tree analysis and the conserved domain comparisons of IAPs. (PDF 116 KB) [file 12864_2014_6342_MOESM8_ESM.pdf]

Table S6. Sequence accession numbers of the phylogenetic tree analysis and the conserved domain comparisons of IAPs.

[illegible]
